# Supplementary material
Source: PubMed Central journal article supplement (PMC4071300)
Supplement: NIHMS519864-supplement.pdf [file NIHMS519864-supplement.pdf]

## Supplemental Information

### Evidence for Immune System Dysfunction and Inflammation in Schizophrenia

Multiple lines of evidence support an association between immune system dysfunction and schizophrenia. Immune system-related genes, including cytokines (1), cytokine pathways (2), and the major histocompatibility complex (3-5) are all associated with schizophrenia. Prenatal maternal infections (with a variety of agents) are a replicated risk factor for schizophrenia, and cytokines are a plausible common pathway by which infections exert this risk (6). Indeed, in prenatal immune activation animal models of schizophrenia, adult offspring have abnormal blood cytokine levels at an age homologous to the usual age of onset of schizophrenia (7,8). There is also an increased prevalence of autoimmune disease in both patients with schizophrenia and their first-degree relatives (9), suggesting that immune system abnormalities may be an endophenotype of the disorder.

In addition to the above-mentioned risk factors, there is other converging evidence of immune system dysfunction and inflammation in patients with schizophrenia. Abnormal levels of acute phase proteins—plasma proteins synthesized by the liver in response to inflammation—including haptoglobin,  $\alpha$ 1-antitrypsin, and c-reactive protein have been reported in patients with schizophrenia (10-14). There is replicated evidence for increased absolute blood monocytes in patients with schizophrenia (15-17). Blood lymphocyte subsets are also abnormal in schizophrenia, with a decreased CD4/CD8 ratio reported in several studies (18-20). Blood levels of neopterin, a marker of increased cell-mediated immunity and oxidative stress, are increased in schizophrenia (21-23). In parallel to these findings, there is also increased measures oxidative and nitrosative stress in schizophrenia (21,24). Both oxidative stress and aberrant cytokine levels may contribute to decreased blood and central nervous system (CNS) membrane levels of polyunsaturated fatty acids observed in schizophrenia (25).

Cytokines in the periphery can cross the blood brain barrier (BBB) and activate astrocytes. A meta-analysis found significantly increased serum levels of S100 $\beta$ , a marker of astrocyte activation and BBB dysfunction, in patients with schizophrenia (26). Calprotectin, another member of the S100 family and a non-specific marker of inflammation, was up-regulated in frontal cortical microglia in post-mortem brains (27), and positron emission tomography (PET) studies have demonstrated microglial activation in recent-onset schizophrenia (28). CNS levels of neural cell adhesion molecule and soluble inter-cellular adhesion molecule-1, which play important roles in neurodevelopment, neuroplasticity, and immune function, are also abnormal in schizophrenia (29,30). Indoleamine 2,3-dioxygenase

(IDO), the rate-limiting enzyme in tryptophan degradation, is also expressed in astrocytes and microglia, and its activity can be modulated by cytokines. IDO induction results in increased production of kynurenine, which is converted in astrocytes to the NMDA receptor antagonist kynurenic acid (KYN-A). NMDA receptor hypofunction has been implicated in the pathophysiology of schizophrenia (31,32). Previous studies have found increased blood (33), cerebrospinal fluid (CSF) (34), and postmortem brain (35) levels of KYN-A, as well as increased IDO activity (36) in patients with schizophrenia.

### **Cytokine Profiles of Activated Immune Cells**

Activated immune cells have characteristic cytokine profiles. CD4<sup>+</sup> T-helper (Th) lymphocytes are important regulators of both humoral and cell-mediated immunity (CMI). In response to an antigen and the local cytokine milieu, naïve Th cells can differentiate into a variety of effector cells that direct diverse immune functions. Th1 cells, which secrete IFN- $\gamma$ , IL-2, and IL-12, stimulate CMI, and thereby promote proliferation of cytotoxic CD8<sup>+</sup> T-lymphocytes and maximize the killing efficacy of macrophages. By contrast, Th2 cells secrete IL-4, IL-6, and IL-10, which stimulate proliferation of B-lymphocytes, induce B-cell antibody class switching and production of neutralizing antibodies. Th3 cells produce TGF- $\beta$  and IL-10, and are involved in mucosal immunity and protection. Activated monocytes/macrophages have increased production of IL-1 $\beta$ , IL-6, IL-8, and TNF- $\alpha$ , which enhance the inflammatory response. Concomitant to the increased production of “pro-inflammatory cytokines”, the “compensatory anti-inflammatory response syndrome” (CARS) is a counter-regulatory mechanism that inhibits the primary inflammatory response and involves an adaptive reprogramming of leukocytes (37). Mediators of the CARS include IL-1RA, sTNF-R, and TGF- $\beta$ . Table S1 describes characteristic cytokines (or cytokine receptors or antagonists) that have been studied in schizophrenia, including their sources and major functions.

**Table S1.** Sources and functions of cytokines (or cytokine receptor or antagonists) studied in schizophrenia

| <b>Cytokines (or Cytokine Receptor or Antagonists)</b> | <b>Source(s)</b>                    | <b>Selected Function/Notes</b>                                                     |
|--------------------------------------------------------|-------------------------------------|------------------------------------------------------------------------------------|
| IL-1 $\beta$                                           | Macrophages                         | Pro-inflammatory; Induces acute phase proteins, and IL-6                           |
| IL-1RA                                                 | Macrophages                         | CARS; Competitive antagonist for IL-1R                                             |
| IL-2                                                   | Th1 Lymphocytes                     | T-cell activation; Stimulates CMI                                                  |
| sIL-2R                                                 | T-lymphocytes                       | Shed into serum during T-cell activation; Marker of CMI                            |
| IL-4                                                   | Th2 Lymphocytes                     | Inhibits IFN- $\gamma$ production by Th1 cells; Stimulates B-cell synthesis of IgE |
| IL-6                                                   | Monocytes;<br>Th2 Lymphocytes       | Pro-inflammatory; Induces acute phase proteins, and late B-cell differentiation    |
| sIL-6R                                                 | Macrophages;<br>Th2 Lymphocytes     | Binds and enhances function of IL-6                                                |
| IL-8                                                   | Monocytes                           | Pro-inflammatory; Induces neutrophil and T-cell chemotaxis                         |
| IL-10                                                  | Th2 Lymphocytes;<br>Th3 Lymphocytes | CARS; Inhibits IFN- $\gamma$ production by Th1 cells                               |
| IL-12                                                  | Macrophages;<br>B-lymphocytes       | Pro-inflammatory; Promotes Th1 cell differentiation and IFN- $\gamma$ production   |
| TNF- $\alpha$                                          | Macrophages                         | Pro-inflammatory; Induces acute phase proteins                                     |
| sTNF-R                                                 | Macrophages                         | CARS; Competitive antagonist for TNF- $\alpha$                                     |
| TGF- $\beta$                                           | Th3 Lymphocytes                     | CARS; Inhibits T- and B-cell proliferation, reduces cytokine receptors             |
| IFN- $\gamma$                                          | Th1 Lymphocytes                     | Macrophage activation                                                              |

CARS, compensatory anti-inflammatory response syndrome; CMI, cell-mediated immunity; IFN, interferon; IL, interleukin; s, soluble; TGF, transforming growth factor; TNF, tumor necrosis factor;

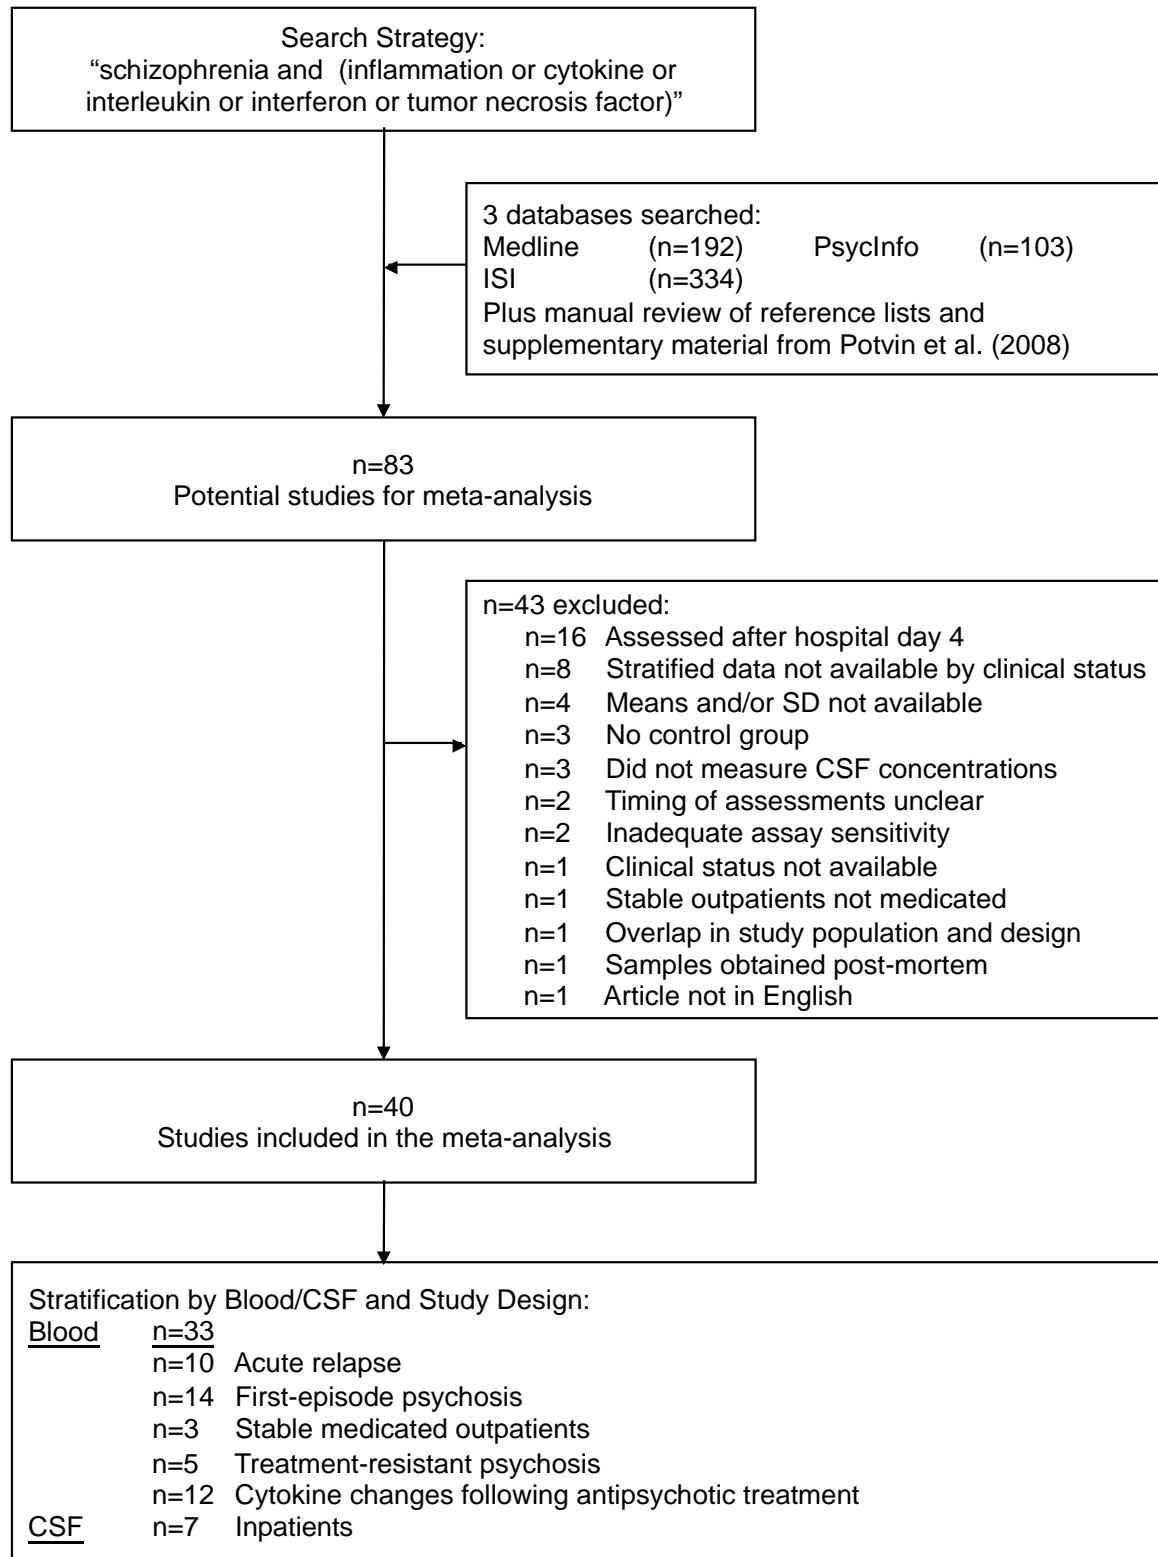

**Figure S1.** Flow chart of the study selection process

**Table S2.** Studies of cytokines (or cytokine receptors or antagonists) in schizophrenia

| <b>Blood</b>                           |                                                                  |              |                      |                 |                 |                                                    |
|----------------------------------------|------------------------------------------------------------------|--------------|----------------------|-----------------|-----------------|----------------------------------------------------|
| <b>Study</b>                           | <b>Cytokines</b>                                                 | <b>Assay</b> | <b>Antipsychotic</b> | <b>Location</b> | <b>Included</b> | <b>Patient Group(s)/Comment</b>                    |
| <b>Akiyama 1999 (23)</b>               | sIL-2R, IL-6, IL-1RA                                             | Sandwich     | No                   | Japan           | <b>Yes</b>      | <b>FEP</b>                                         |
| <b>Baker 1996 (24)</b>                 | IL-1 $\beta$ , sIL-2R, IL-6, TNF- $\alpha$                       | ELISA        | Yes/No               | U.S.            | <b>Yes</b>      | <b>TR</b>                                          |
| Barak 1995 (25)                        | IL-1 $\beta$ , IL-2, sIL-2R, IL-6                                | RIA          | Yes                  | Israel          | No              | Timing of assessment unclear                       |
| <b>Barry 2009 (22)</b>                 | IFN- $\gamma$                                                    | ELISA        | Yes                  | Ireland         | <b>Yes</b>      | <b>SO</b>                                          |
| <b>Becker 1990 (27)</b>                | IFN                                                              | SMA          | No                   | Israel          | <b>Yes</b>      | <b>FEP</b>                                         |
| <b>Bresee &amp; Rapaport 2009 (28)</b> | sIL-2R                                                           | ELISA        | Yes                  | U.S.            | <b>Yes</b>      | <b>TR</b>                                          |
| Cazzullo 2002 (29)                     | IL-2, IL-4, IL-10, IFN- $\gamma$                                 | ELISA        | No                   | Italy           | No              | Stratified data not available                      |
| Cohelo 2008 (30)                       | TNF- $\alpha$ , sTNF-R1, sTNF-R2                                 | ELISA        | Yes                  | Brazil          | No              | Assessed at >4 days                                |
| <b>Crespo-Facorro 2008 (31)</b>        | IL-12                                                            | ELISA        | No                   | Spain           | <b>Yes</b>      | <b>FEP; Treatment</b>                              |
| <b>Drexhage 2008 (32)</b>              | IL-1 $\beta$ , IL-6, TNF- $\alpha$                               | CBA          | Yes                  | Netherlands     | <b>Yes</b>      | <b>SO</b>                                          |
| Ebrinc 2002 (33)                       | IL-1RA, IL-2                                                     | ELISA        | No                   | Turkey          | No              | Outpatients not medicated                          |
| Erbagci 2001 (35)                      | IL-1 $\beta$ , sIL-2R, IL-6, IL-8, TNF- $\alpha$                 | ELISA        | Yes/No               | Turkey          | No              | Assessed at >4 days                                |
| <b>Fernandez-Egea 2009 (36)</b>        | IL-6; TNF- $\alpha$                                              | ELISA        | No                   | Spain           | <b>Yes</b>      | <b>FEP</b>                                         |
| <b>Frommberger 1997 (37)</b>           | IL-6                                                             | Bioassay     | No                   | Germany         | <b>Yes</b>      | <b>AR; Treatment</b>                               |
| <b>Ganguli 1989 (38)</b>               | sIL-2R                                                           | ELISA        | Yes/No               | U.S.            | <b>Yes</b>      | <b>FEP</b>                                         |
| <b>Ganguli 1994 (39)</b>               | IL-6                                                             | ELISA        | Yes/No               | U.S.            | <b>Yes</b>      | <b>AR</b>                                          |
| Garcia-Miss 2009 (40)                  | IL-6, TNF- $\alpha$                                              | RIA          | Yes                  | Mexico          | No              | Assessed at >4 days                                |
| <b>Gattaz 1992 (41)</b>                | IL-2, IFN- $\gamma$ , IFN- $\alpha$                              | ELISA        | No                   | Germany         | <b>Yes</b>      | <b>FEP</b>                                         |
| <b>Haack 1999 (42)</b>                 | IL-1RA, sIL-2R, TNF- $\alpha$                                    | ELISA        | Yes/No               | Germany         | <b>Yes</b>      | <b>AR</b>                                          |
| Hope 2009 (43)                         | IL-1RA, IL-6, sTNF-R1                                            | ELISA        | Yes/No               | Norway          | No              | Stratified data not available                      |
| <b>Kaminska 2001 (44)</b>              | IL-6, IL-8, IL-10, IFN- $\gamma$ , IFN- $\alpha$ , TNF- $\alpha$ | ELISA        | Yes                  | Poland          | <b>Yes</b>      | <b>AR</b>                                          |
| Katila 1994 (45)                       | IL-1 $\beta$                                                     | ELISA        | Yes                  | Finland         | No              | Stratified data not available                      |
| <b>Kim 2000 (46)</b>                   | IL-1 $\beta$ , IL-2, IL-6                                        | ELISA        | Yes                  | Korea           | <b>Yes</b>      | <b>AR; FEP; Treatment</b>                          |
| <b>Kim 2001 (47)</b>                   | IL-1 $\beta$ , IL-2, IL-6, IL-12, IFN- $\gamma$                  | ELISA        |                      |                 | <b>Yes</b>      | <b>Treatment</b>                                   |
| <b>Kim 2002 (48)</b>                   | IL-12                                                            | ELISA        | No                   | Korea           | <b>Yes</b>      | <b>AR; FEP; Treatment</b>                          |
| <b>Kim 2004 (49)</b>                   | TGF- $\beta$                                                     | ELISA        | No                   | Korea           | <b>Yes</b>      | <b>AR; FEP; Treatment</b>                          |
| <b>Kim 2009 (50)</b>                   | IL-2, IL-4, IL-6, TNF- $\alpha$ , TGF- $\beta$                   | ELISA        | No                   | Korea           | <b>Yes</b>      | <b>AR; FEP; Treatment</b>                          |
| Kowalski 2001 (19)                     | IL-1 $\beta$                                                     | ELISA        | No                   | Poland          | No              | Stratified data not available<br>Mean/SD not given |
| <b>Lin 1998 (52)</b>                   | IL-6, sIL-6R                                                     | ELISA        | Yes                  | Italy           | <b>Yes</b>      | <b>TR</b>                                          |
| Maes 1994 (54)                         | sIL-2R, IL-6, sIL-6R                                             | ELISA        | No                   | U.S.            | No              | Assessed at >4 days                                |
| Maes 1995 (55)                         | IL-6                                                             | ELISA        | No                   | U.S.            | No              | Assessed at >4 days                                |
| Maes 1995b (56)                        | sIL-2R, IL-6, sIL-6R                                             | ELISA        | No                   | U.S.            | No              | Assessed at >4 days                                |
| <b>Maes 1996 (57)</b>                  | IL-1RA, sIL-2R                                                   | ELISA        | Yes/No               | U.S.            | <b>Yes</b>      | <b>AR</b>                                          |

**Table S2.** (continued)

| <b>Study</b>                    | <b>Cytokines</b>                                         | <b>Assay</b> | <b>Antipsychotic</b> | <b>Location</b> | <b>Included</b> | <b>Patient Group(s)/Comment</b> |
|---------------------------------|----------------------------------------------------------|--------------|----------------------|-----------------|-----------------|---------------------------------|
| Maes 1997 (58)                  | IL-1RA, IL-6, sIL-6R                                     | ELISA        | Yes/No               | Belgium         | No              | Assessed at >4 days             |
| <b>Maes 2000 (59)</b>           | IL-1RA, IL-6, sIL-6R                                     | ELISA        | Yes                  | Italy           | <b>Yes</b>      | <b>TR</b>                       |
| <b>Maes 2002 (60)</b>           | IL-10                                                    | ELISA        | No                   | Italy           | <b>Yes</b>      | <b>TR</b>                       |
| Monteleone 1997 (61)            | IL-6, TNF- $\alpha$                                      | ELISA        | No                   | Italy           | No              | Assessed at >4 days             |
| Muller 1997 (62)                | sIL-6R                                                   | ELISA        | Yes                  | Germany         | No              | Assessed at >4 days             |
| <b>Muller 1997b (63)</b>        | sIL-2R, sIL-6R                                           | ELISA        | No                   | Germany         | <b>Yes</b>      | <b>Treatment</b>                |
| Naudin 1996 (64)                | IL-6, TNF- $\alpha$                                      | RIA          | Yes                  | France          | No              | Timing of assessment unclear    |
| Naudin 1997 (65)                | IL-1 $\beta$ , IL-1RA, sIL-2R                            | ELISA        | Yes                  | France          | No              | Stratified data not available   |
| Nimgaonakar 1995 (68)           | sIL-2R                                                   | ELISA        | Unknown              | U.S.            | No              | Stratified data not available   |
| Nunes 2006 (8)                  | IL-6                                                     | CIA          | Yes                  | Brazil          | No              | Mean/SD not given               |
| <b>O'Brien 2008 (69)</b>        | IL-6, sIL-6R IL-8,<br>IL-10, TNF- $\alpha$               | ELISA        | Yes                  | Ireland         | <b>Yes</b>      | <b>AR</b>                       |
| <b>Pae 2006 (70)</b>            | IL-2, IL-6, IL-10, IL-1, TNF- $\alpha$                   | ELISA        | Yes/No               | Korea           | <b>Yes</b>      | <b>Treatment</b>                |
| Rapaport 1989 (72)              | sIL-2R                                                   | ELISA        | Yes                  | U.S.            | No              | Assessed at >4 days             |
| Rapaport 1993 (73)              | sIL-2R                                                   | ELISA        | Yes                  | U.S.            | No              | Assessed at >4 days             |
| Rapaport 1994 (74)              | sIL-2R                                                   | ELISA        | Yes                  | U.S., Korea     | No              | Assessed at >4 days             |
| <b>Rapaport 1994b (75)</b>      | sIL-2R                                                   | ELISA        | No                   | U.S.            | <b>Yes</b>      | <b>FEP</b>                      |
| Rapaport 1997 (76)              | sIL-2R                                                   | ELISA        | No                   | U.S.            | No              | No control group                |
| Sarandol 2007 (79)              | TNF- $\alpha$                                            | ELISA        | Yes                  | Turkey          | No              | Stratified data not available   |
| Schattner 1996 (80)             | TNF- $\alpha$                                            | Bioassay     | No                   | Israel          | No              | Stratified data not available   |
| <b>Schwarz 1998 (81)</b>        | sIL-2R                                                   | ELISA        | No                   | Germany         | <b>Yes</b>      | <b>Treatment</b>                |
| Shintani 1991 (82)              | IL-6                                                     | ELISA        | Yes                  | Japan           | No              | Assessed at >4 days             |
| <b>Singh 2009 (83)</b>          | IL-2, IL-6                                               | ELISA        | Yes/No               | India           | <b>Yes</b>      | <b>SO</b>                       |
| <b>Sirota 2005 (84)</b>         | IL-1RA, sIL-2R                                           | ELISA        | No                   | Israel          | <b>Yes</b>      | <b>Treatment</b>                |
| <b>Song 2009 (86)</b>           | IL-1 $\beta$ , TNF- $\alpha$                             | ELISA        | No                   | China           | <b>Yes</b>      | <b>FEP; Treatment</b>           |
| <b>Theodoropoulou 2001 (87)</b> | IL-1 $\beta$ , IL-2, TNF- $\alpha$                       | ELISA        | Yes                  | Greece          | <b>Yes</b>      | <b>FEP</b>                      |
| van Kammen 1999 (7)             | IL-6                                                     | ELISA        | Yes/No               | U.S.            | No              | Assessed at >4 days             |
| Wilke 1996 (20)                 | IL-2, IFN- $\gamma$                                      | ELISA        | Yes                  | Germany         | No              | Stratified data not available   |
| <b>Xiu 2008 (90)</b>            | IL-3                                                     | ELISA        | Yes                  | China           | <b>Yes</b>      | <b>FEP</b>                      |
| Xu 1994 (94)                    | IL-1 $\alpha$ , IL-1 $\beta$ , IL-2, IL-6, TNF- $\alpha$ | RIA          | Yes/No               | UK              | No              | Inadequate assay sensitivity    |
| Yang 1994 (91)                  | IL-2                                                     | ELISA        | Yes/No               | U.S.            | No              | Clinical status not available   |
| Zhang 2002 (93)                 | IL-2, IL-6                                               | ELISA        | No                   | China           | No              | Assessed at >4 days             |
| Zhang 2004 (95)                 | IL-2, IL-6                                               | ELISA        | No                   | China           | No              | Assessed at >4 days             |
| Zhang 2005 (96)                 | IL-2, IL-6                                               | ELISA        | No                   | China           | No              | Population overlap (Zhang 2004) |
| Zhang 2008 (97)                 | IL-2, IL-6, IL-8, TNF- $\alpha$                          | ELISA        | Yes                  | China           | No              | No control group                |
| Zhang 2009 (98)                 | IL-2, IL-6                                               | ELISA        | Yes/No               | China           | No              | Assessed at >4 days             |

**Table S2.** (continued)

| <b>CSF</b>                  |                                   |                 |                      |                 |                 |                                 |
|-----------------------------|-----------------------------------|-----------------|----------------------|-----------------|-----------------|---------------------------------|
| <b>Study</b>                | <b>Cytokines</b>                  | <b>Assay</b>    | <b>Antipsychotic</b> | <b>Location</b> | <b>Included</b> | <b>Patient Group(s)/Comment</b> |
| <b>Barak 1995 (25)</b>      | IL-1 $\beta$ , IL-2, sIL-2R, IL-6 | RIA             | Yes                  | Israel          | <b>Yes</b>      | Inpatients                      |
| Bechter 2010 (26)           | None                              | N/A             | Yes                  | Germany         | No              | Did not measure CSF cytokines   |
| <b>el-Mallakh 1993 (34)</b> | IL-2                              | ELISA           | Yes/No               | U.S.            | <b>Yes</b>      | Inpatients                      |
| <b>Garver 2003 (6)</b>      | IL-6                              | ELISA           | Yes                  | U.S.            | <b>Yes</b>      | Inpatients                      |
| <b>Katila 199 (45)</b>      | IL-1 $\beta$                      | ELISA           | Yes                  | Finland         | <b>Yes</b>      | Inpatients                      |
| <b>Licinio 1993 (51)</b>    | IL-1 $\alpha$ , IL-2              | ELISA           | No                   | U.S.            | <b>Yes</b>      | Inpatients                      |
| Lu 2003 (53)                | sIL-2R, IL-10, TNF- $\alpha$      | ELISA           | No                   | China           | No              | Article in Chinese              |
| McAllister 1995 (78)        | IL-2                              | ELISA           | No                   | U.S.            | No              | No control group                |
| Muller 1997 (62)            | sIL-6R                            | ELISA           | Yes                  | Germany         | No              | No control group                |
| Nikkila 1999 (66)           | None                              | N/A             | No                   | Finland         | No              | Did not measure CSF cytokines   |
| Nikkila 2002 (67)           | None                              | N/A             | No                   | Finland         | No              | Did not measure CSF cytokines   |
| Preble & Torrey, 1985 (71)  | IFN                               | Semimicromethod | Yes                  | Ireland         | No              | Mean/SD not given               |
| <b>Rapaport 1997 (77)</b>   | IL-1 $\alpha$ , IL-2              | ELISA           | Yes                  | U.S.            | <b>Yes</b>      | Inpatients                      |
| Soderlund 2009 (85)         | IL-1 $\beta$ , IL-6, IL-8         | ELISA           | Unknown              | Not specified   | No              | Mean/SD not given               |
| van Kammen 1999 (7)         | IL-6                              | ELISA           | Yes/No               | U.S.            | No              | Inadequate assay sensitivity    |
| Vawter 1996 (88)            | TGF- $\beta$ 1, TGF- $\beta$ 2    | ELISA           | Unknown              | U.S.            | No              | Samples obtained post-mortem    |
| <b>Vawter 1997 (89)</b>     | TGF- $\beta$ 1, TGF- $\beta$ 2    | ELISA           | Unknown              | U.S.            | <b>Yes</b>      | Inpatients                      |
| Yao 200 (92)                | IL-6, IL-10                       | ELISA           | Yes                  | U.S.            | No              | Mean/SD not given               |

Studies that were included are indicated by bold font.

Reference numbers within the table refer to references in the main text.

AR, acutely relapsed inpatients; CBA, cytometric bead array; CIA, chemiluminescent immunoassay; CSF, cerebrospinal fluid; ELISA, enzyme-linked immunosorbent assay; FEP, first-episode psychosis; IFN, interferon; IL, interleukin; RIA, radioimmunoassay; s, soluble; SMA, semimicroassay; SO, stable medicated outpatients; TGF, transforming growth factor; TNF, tumor necrosis factor; TR, treatment-resistant psychosis.

**Table S3.** Effect size estimates for individual cytokines (or cytokine receptors or antagonists)

| Study                 | Schizophrenia |          |         | Control  |          |         | Hedges <i>g</i> | 95% CI |       | Cytokine      | Notes | Clinical Status |
|-----------------------|---------------|----------|---------|----------|----------|---------|-----------------|--------|-------|---------------|-------|-----------------|
|                       | Mean          | <i>N</i> | SD      | Mean     | <i>N</i> | SD      |                 | Lower  | Upper |               |       |                 |
| Frommberger 1997 (37) | 1.45          | 32       | 0.53    | 1.01     | 12       | 0.18    | 0.93            | 0.24   | 1.62  | IL-6          | Blood | AR              |
| Ganguli 1994 (39)     | -0.88         | 35       | 0.93    | -1.05    | 110      | 1.11    | 0.16            | -0.22  | 0.54  | IL-6          | Blood | AR              |
| Haack 1999 (42)       | 196.50        | 18       | 206.10  | 192.90   | 64       | 124.90  | 0.02            | -0.50  | 0.55  | IL-1RA        | Blood | AR              |
| Haack 1999 (42)       | 194.10        | 18       | 114.20  | 189.50   | 64       | 90.40   | 0.05            | -0.48  | 0.57  | sIL-2R        | Blood | AR              |
| Haack 1999 (42)       | 9.31          | 18       | 5.60    | 10.92    | 64       | 3.64    | -0.38           | -0.91  | 0.14  | TNF- $\alpha$ | Blood | AR              |
| Kaminska 2001 (44)    | 0.33          | 24       | 1.36    | 0.87     | 28       | 2.91    | -0.23           | -0.77  | 0.32  | IFN- $\alpha$ | Blood | AR              |
| Kaminska 2001 (44)    | 8.52          | 24       | 8.29    | 2.35     | 28       | 4.62    | 0.92            | 0.35   | 1.50  | IFN- $\gamma$ | Blood | AR              |
| Kaminska 2001 (44)    | 0.34          | 24       | 1.38    | 11.04    | 28       | 14.94   | -0.95           | -1.53  | -0.38 | IL-10         | Blood | AR              |
| Kaminska 2001 (44)    | 5.05          | 24       | 3.05    | 2.54     | 28       | 2.51    | 0.89            | 0.32   | 1.46  | IL-6          | Blood | AR              |
| Kaminska 2001 (44)    | 104.38        | 24       | 160.15  | 6.12     | 28       | 16.89   | 0.88            | 0.31   | 1.45  | IL-8          | Blood | AR              |
| Kaminska 2001 (44)    | 2.31          | 24       | 3.43    | 5.43     | 28       | 7.18    | -0.53           | -1.09  | 0.02  | TNF- $\alpha$ | Blood | AR              |
| Kim 2000 (46)         | 1.56          | 10       | 0.68    | 1.30     | 25       | 0.30    | 0.58            | -0.17  | 1.33  | IL-1 $\beta$  | Blood | AR              |
| Kim 2000 (46)         | 2.97          | 10       | 2.22    | 1.70     | 25       | 0.10    | 1.07            | 0.29   | 1.84  | IL-2          | Blood | AR              |
| Kim 2000 (46)         | 2.40          | 10       | 1.11    | 2.00     | 25       | 0.50    | 0.54            | -0.20  | 1.29  | IL-6          | Blood | AR              |
| Kim 2002 (48)         | 13.00         | 21       | 13.80   | 9.30     | 85       | 3.50    | 0.53            | 0.05   | 1.02  | IL-12         | Blood | AR              |
| Kim 2004 (49)         | 27.30         | 45       | 10.30   | 18.20    | 88       | 11.10   | 0.83            | 0.45   | 1.20  | TGF- $\beta$  | Blood | AR              |
| Kim 2009 (50)         | 570.70        | 33       | 261.50  | 489.99   | 174      | 257.49  | 0.31            | -0.07  | 0.68  | IFN- $\gamma$ | Blood | AR              |
| Kim 2009 (50)         | 126.60        | 33       | 142.20  | 255.18   | 174      | 231.76  | -0.57           | -0.95  | -0.20 | IL-2          | Blood | AR              |
| Kim 2009 (50)         | 110.20        | 33       | 111.80  | 268.72   | 174      | 110.01  | -1.41           | -1.81  | -1.02 | IL-4          | Blood | AR              |
| Kim 2009 (50)         | 464.70        | 33       | 123.00  | 234.08   | 174      | 53.29   | 3.29            | 2.80   | 3.78  | IL-6          | Blood | AR              |
| Kim 2009 (50)         | 804.60        | 33       | 367.30  | 717.90   | 174      | 375.15  | 0.23            | -0.14  | 0.60  | TGF- $\beta$  | Blood | AR              |
| Kim 2009 (50)         | 859.50        | 33       | 244.90  | 577.51   | 174      | 171.88  | 1.50            | 1.10   | 1.90  | TNF- $\alpha$ | Blood | AR              |
| Maes 1996 (57)        | 0.34          | 14       | 0.23    | 0.16     | 30       | 0.06    | 1.29            | 0.60   | 1.97  | IL-1RA        | Blood | AR              |
| Maes 1996 (57)        | 82.00         | 14       | 82.00   | 45.00    | 30       | 44.00   | 0.62            | -0.03  | 1.27  | sIL-2R        | Blood | AR              |
| O'Brien 2008 (69)     | 1.59          | 22       | 0.80    | 1.76     | 24       | 0.98    | -0.19           | -0.77  | 0.39  | IL-10         | Blood | AR              |
| O'Brien 2008 (69)     | 0.32          | 22       | 0.31    | 0.36     | 24       | 0.29    | -0.12           | -0.70  | 0.45  | IL-6          | Blood | AR              |
| O'Brien 2008 (69)     | 2.30          | 22       | 2.44    | 1.72     | 24       | 1.42    | 0.29            | -0.29  | 0.87  | IL-8          | Blood | AR              |
| O'Brien 2008 (69)     | 20740.00      | 22       | 2980.29 | 19330.00 | 24       | 2865.41 | 0.47            | -0.11  | 1.06  | sIL-6R        | Blood | AR              |
| O'Brien 2008 (69)     | 13.49         | 22       | 2.02    | 6.79     | 24       | 2.06    | 3.23            | 2.35   | 4.11  | TNF- $\alpha$ | Blood | AR              |
| Akiyama 1999 (23)     | 342.70        | 14       | 229.20  | 242.30   | 26       | 82.50   | 0.65            | -0.01  | 1.32  | IL-1RA        | Blood | FEP             |
| Akiyama 1999 (23)     | 2165.00       | 14       | 2029.00 | 999.00   | 26       | 495.00  | 0.91            | 0.23   | 1.59  | IL-6          | Blood | FEP             |



**Table S3.** (continued)

| Study                    | Schizophrenia |          |         | Control |          |         | Hedges <i>g</i> | 95% CI |       | Cytokine      | Notes | Clinical Status |
|--------------------------|---------------|----------|---------|---------|----------|---------|-----------------|--------|-------|---------------|-------|-----------------|
|                          | Mean          | <i>N</i> | SD      | Mean    | <i>N</i> | SD      |                 | Lower  | Upper |               |       |                 |
| Akiyama 1999 (23)        | 739.30        | 14       | 217.20  | 520.90  | 26       | 12.4    | 1.67            | 0.93   | 2.42  | sIL-2R        | Blood | FEP             |
| Crespo 2008 (31)         | 50.20         | 56       | 20.30   | 4.60    | 28       | 4.59    | 2.66            | 2.06   | 3.27  | IL-12         | Blood | FEP             |
| Fernandez-Egea 2008 (36) | 3.63          | 50       | 6.91    | 1.02    | 50       | 2.10    | 0.50            | 0.10   | 0.90  | IL-6          | Blood | FEP             |
| Fernandez-Egea 2008 (36) | 5.44          | 26       | 3.58    | 4.50    | 22       | 2.61    | 0.29            | -0.28  | 0.86  | TNF- $\alpha$ | Blood | FEP             |
| Ganguli 1989 (38)        | 294.70        | 4        | 58.20   | 343.80  | 57       | 138.917 | -0.36           | -1.37  | 0.66  | sIL-2R        | Blood | FEP             |
| Gattaz 1992 (41)         | 20.80         | 10       | 32.40   | 13.00   | 15       | 16.90   | 0.31            | -0.49  | 1.12  | IFN- $\gamma$ | Blood | FEP             |
| Gattaz 1992 (41)         | 0.49          | 10       | 0.37    | 0.69    | 15       | 11.00   | -0.02           | -0.82  | 0.78  | IL-2          | Blood | FEP             |
| Kim 2000 (46)            | 1.55          | 15       | 0.85    | 1.30    | 25       | 0.30    | 0.43            | -0.22  | 1.08  | IL-1 $\beta$  | Blood | FEP             |
| Kim 2000 (46)            | 2.59          | 15       | 1.49    | 1.70    | 25       | 0.10    | 0.96            | 0.28   | 1.63  | IL-2          | Blood | FEP             |
| Kim 2000 (46)            | 2.85          | 15       | 1.83    | 2.00    | 25       | 0.50    | 0.70            | 0.04   | 1.36  | IL-6          | Blood | FEP             |
| Kim 2002 (48)            | 9.20          | 22       | 4.60    | 9.30    | 85       | 3.50    | -0.03           | -0.50  | 0.44  | IL-12         | Blood | FEP             |
| Kim 2004 (49)            | 28.40         | 43       | 10.20   | 18.20   | 88       | 11.10   | 0.93            | 0.55   | 1.31  | TGF- $\beta$  | Blood | FEP             |
| Kim 2009 (50)            | 676.00        | 38       | 304.00  | 489.99  | 174      | 257.49  | 0.69            | 0.33   | 1.04  | IFN- $\gamma$ | Blood | FEP             |
| Kim 2009 (50)            | 180.30        | 38       | 197.50  | 255.18  | 174      | 231.76  | -0.33           | -0.68  | 0.03  | IL-2          | Blood | FEP             |
| Kim 2009 (50)            | 83.00         | 38       | 80.40   | 268.72  | 174      | 110.01  | -1.73           | -2.12  | -1.34 | IL-4          | Blood | FEP             |
| Kim 2009 (50)            | 452.20        | 38       | 111.50  | 234.08  | 174      | 53.29   | 3.19            | 2.72   | 3.65  | IL-6          | Blood | FEP             |
| Kim 2009 (50)            | 753.40        | 38       | 283.90  | 717.90  | 174      | 375.15  | 0.10            | -0.25  | 0.45  | TGF- $\beta$  | Blood | FEP             |
| Kim 2009 (50)            | 902.30        | 38       | 244.60  | 577.51  | 174      | 171.88  | 1.71            | 1.32   | 2.10  | TNF- $\alpha$ | Blood | FEP             |
| Rapaport 1994b (75)      | 1705.70       | 12       | 1124.20 | 739.80  | 14       | 325.5   | 1.17            | 0.33   | 2.00  | sIL-2R        | Blood | FEP             |
| Song 2009 (86)           | 25.93         | 83       | 13.30   | 14.19   | 65       | 7.86    | 1.03            | 0.68   | 1.37  | IL-1 $\beta$  | Blood | FEP             |
| Song 2009 (86)           | 31.01         | 83       | 13.82   | 21.33   | 65       | 8.90    | 0.80            | 0.46   | 1.14  | TNF- $\alpha$ | Blood | FEP             |
| Theodoropoulou 2001 (87) | 21.40         | 53       | 58.24   | 12.00   | 62       | 47.24   | 0.18            | -0.19  | 0.54  | IL-1 $\beta$  | Blood | FEP             |
| Theodoropoulou 2001 (87) | 220.00        | 53       | 182.00  | 271.00  | 62       | 393.70  | -0.16           | -0.53  | 0.21  | IL-2          | Blood | FEP             |
| Theodoropoulou 2001 (87) | 24.00         | 53       | 8.00    | 16.00   | 62       | 47.24   | 0.22            | -0.14  | 0.59  | TNF- $\alpha$ | Blood | FEP             |
| Xiu 2008 (90)            | 4.30          | 24       | 7.00    | 15.50   | 26       | 10.90   | -1.19           | -1.79  | -0.59 | IL-3          | Blood | FEP             |
| Barry 2009 (22)          | 1.22          | 34       | 0.29    | 0.85    | 36       | 0.13    | 1.63            | 1.09   | 2.18  | IFN- $\gamma$ | Blood | SO              |
| Drexhage 2008 (32)       | 12.33         | 145      | 11.21   | 5.50    | 105      | 6.64    | 0.70            | 0.44   | 0.96  | IL-1 $\beta$  | Blood | SO              |
| Drexhage 2008 (32)       | 43.32         | 145      | 63.77   | 21.65   | 105      | 31.73   | 0.40            | 0.15   | 0.66  | IL-6          | Blood | SO              |
| Drexhage 2008 (32)       | 38.59         | 145      | 47.80   | 15.28   | 105      | 22.06   | 0.59            | 0.33   | 0.84  | TNF- $\alpha$ | Blood | SO              |
| Singh 2009 (83)          | 34.54         | 30       | 22.09   | 56.04   | 30       | 18.82   | -1.03           | -1.57  | -0.49 | IL-2          | Blood | SO              |
| Singh 2009 (83)          | 8.31          | 30       | 6.52    | 33.87   | 30       | 13.6    | -2.36           | -3.02  | -1.70 | IL-6          | Blood | SO              |

**Table S3.** (continued)

| Study            | Schizophrenia |          |        | Control |          |        | Hedges <i>g</i> | 95% CI |       | Cytokine      | Notes | Clinical Status |
|------------------|---------------|----------|--------|---------|----------|--------|-----------------|--------|-------|---------------|-------|-----------------|
|                  | Mean          | <i>N</i> | SD     | Mean    | <i>N</i> | SD     |                 | Lower  | Upper |               |       |                 |
| Baker 1996 (24)  | 0.95          | 32       | 1.88   | 1.47    | 22       | 1.83   | -0.27           | -0.82  | 0.27  | IL-1 $\beta$  | Blood | TR              |
| Baker 1996 (24)  | 2.35          | 46       | 1.61   | 2.82    | 30       | 2.65   | -0.22           | -0.68  | 0.24  | IL-6          | Blood | TR              |
| Baker 1996 (24)  | 1332.00       | 42       | 615.00 | 1240.00 | 31       | 624.00 | 0.15            | -0.32  | 0.61  | sIL-2R        | Blood | TR              |
| Baker 1996 (24)  | 8.12          | 39       | 9.13   | 8.28    | 28       | 9.50   | -0.02           | -0.50  | 0.47  | TNF- $\alpha$ | Blood | TR              |
| Bresee 2009 (28) | 304.00        | 59       | 212.00 | 183.00  | 57       | 109.00 | 0.70            | 0.33   | 1.08  | sIL-2R        | Blood | TR              |
| Lin 1998 (52)    | 6.68          | 15       | 7.31   | 0.38    | 15       | 0.65   | 1.17            | 0.40   | 1.95  | IL-6          | Blood | TR              |
| Maes 2000 (59)   | 0.31          | 17       | 0.20   | 0.08    | 7        | 0.04   | 1.29            | 0.34   | 2.25  | IL-1RA        | Blood | TR              |
| Maes 2000 (59)   | 169.00        | 17       | 46.00  | 143.00  | 7        | 50.00  | 0.53            | -0.36  | 1.43  | sIL-6R        | Blood | TR              |
| Maes 2002 (60)   | 3.28          | 17       | 2.60   | 0.92    | 7        | 0.82   | 1.01            | 0.08   | 1.93  | IL-10         | Blood | TR              |
| Maes 2002 (60)   | 163.70        | 17       | 125.70 | 39.50   | 7        | 29.60  | 1.11            | 0.17   | 2.04  | IL-8          | Blood | TR              |

| Study                 | Post-Treatment |          |        | Pre-Treatment |          |        | Hedges <i>g</i> | 95% CI |       | Cytokine      | Notes     | Clinical Status |
|-----------------------|----------------|----------|--------|---------------|----------|--------|-----------------|--------|-------|---------------|-----------|-----------------|
|                       | Mean           | <i>N</i> | SD     | Mean          | <i>N</i> | SD     |                 | Lower  | Upper |               |           |                 |
| Crespo 2008 (31)      | 62.80          | 56       | 30.40  | 50.20         | 56       | 20.30  | 0.48            | 0.11   | 0.86  | IL-12         | Treatment | FEP             |
| Frommberger 1997 (37) | 1.18           | 32       | 0.35   | 1.45          | 11       | 0.53   | -0.66           | -1.36  | 0.04  | IL-6          | Treatment | AR              |
| Kim 2000 (46)         | 1.30           | 25       | 0.20   | 1.60          | 25       | 0.70   | -0.57           | -1.14  | -0.01 | IL-1 $\beta$  | Treatment | AR/FEP          |
| Kim 2000 (46)         | 1.80           | 25       | 0.20   | 2.70          | 25       | 1.80   | -0.69           | -1.26  | -0.12 | IL-2          | Treatment | AR/FEP          |
| Kim 2000 (46)         | 2.70           | 25       | 1.30   | 2.70          | 25       | 1.30   | 0.00            | -0.55  | 0.55  | IL-6          | Treatment | AR/FEP          |
| Kim 2001 (47)         | 3.34           | 19       | 2.49   | 5.04          | 19       | 4.63   | -0.45           | -1.09  | 0.20  | IFN- $\gamma$ | Treatment | AR              |
| Kim 2001 (47)         | 175.09         | 19       | 108.14 | 115.99        | 19       | 102.20 | 0.55            | -0.10  | 1.20  | IL-12         | Treatment | AR              |
| Kim 2001 (47)         | 0.95           | 19       | 0.58   | 1.18          | 19       | 0.75   | -0.34           | -0.98  | 0.30  | IL-1 $\beta$  | Treatment | AR              |
| Kim 2001 (47)         | 0.70           | 19       | 2.06   | 1.29          | 19       | 3.92   | -0.18           | -0.82  | 0.45  | IL-2          | Treatment | AR              |
| Kim 2001 (47)         | 5.32           | 19       | 6.34   | 4.39          | 19       | 5.84   | 0.15            | -0.49  | 0.79  | IL-6          | Treatment | AR              |
| Kim 2002 (48)         | 11.50          | 29       | 2.90   | 12.40         | 29       | 12.20  | -0.10           | -0.62  | 0.41  | IL-12         | Treatment | AR/FEP          |
| Kim 2004 (49)         | 20.70          | 66       | 9.70   | 27.70         | 66       | 10.20  | -0.70           | -1.05  | -0.35 | TGF- $\beta$  | Treatment | AR/FEP          |
| Kim 2009 (50)         | 543.97         | 53       | 322.22 | 589.27        | 53       | 308.60 | -0.14           | -0.52  | 0.24  | IFN- $\gamma$ | Treatment | AR/FEP          |
| Kim 2009 (50)         | 206.95         | 53       | 259.03 | 140.33        | 53       | 176.18 | 0.30            | -0.08  | 0.68  | IL-2          | Treatment | AR/FEP          |
| Kim 2009 (50)         | 38.70          | 53       | 25.33  | 46.91         | 53       | 38.37  | -0.25           | -0.63  | 0.13  | IL-4          | Treatment | AR/FEP          |
| Kim 2009 (50)         | 451.55         | 53       | 116.12 | 487.56        | 53       | 100.98 | -0.33           | -0.71  | 0.05  | IL-6          | Treatment | AR/FEP          |
| Kim 2009 (50)         | 758.73         | 53       | 184.11 | 754.71        | 53       | 232.02 | 0.02            | -0.36  | 0.40  | TGF- $\beta$  | Treatment | AR/FEP          |

**Table S3.** (continued)

| Study                | Post-Treatment |          |        | Pre-Treatment |          |        | Hedges <i>g</i> | 95% CI |       | Cytokine       | Notes     | Clinical Status |
|----------------------|----------------|----------|--------|---------------|----------|--------|-----------------|--------|-------|----------------|-----------|-----------------|
|                      | Mean           | <i>N</i> | SD     | Mean          | <i>N</i> | SD     |                 | Lower  | Upper |                |           |                 |
| Kim 2009 (50)        | 850.97         | 53       | 240.24 | 923.39        | 53       | 289.68 | -0.27           | -0.65  | 0.11  | TNF- $\alpha$  | Treatment | AR/FEP          |
| Muller 1997b (63)    | 645.00         | 30       | 331.00 | 530.00        | 30       | 260.00 | 0.38            | -0.13  | 0.89  | sIL-2R         | Treatment | AR              |
| Muller 1997b (63)    | 37.60          | 39       | 8.90   | 42.50         | 39       | 14.30  | -0.41           | -0.86  | 0.04  | sIL-6R         | Treatment | AR              |
| Pae 2006 (70)        | 4.90           | 35       | 3.80   | 3.80          | 35       | 1.00   | 0.39            | -0.08  | 0.86  | IL-10          | Treatment | AR/FEP          |
| Pae 2006 (70)        | 2.00           | 35       | 4.70   | 1.90          | 35       | 3.30   | 0.02            | -0.44  | 0.49  | IL-2           | Treatment | AR/FEP          |
| Pae 2006 (70)        | 16.20          | 35       | 10.10  | 25.70         | 35       | 19.40  | -0.61           | -1.09  | -0.13 | IL-6           | Treatment | AR/FEP          |
| Pae 2006 (70)        | 13.50          | 35       | 8.90   | 14.80         | 35       | 10.80  | -0.13           | -0.60  | 0.34  | TNF- $\alpha$  | Treatment | AR/FEP          |
| Schwarz 1998 (81)    | 634.80         | 28       | 345.40 | 473.00        | 28       | 220.90 | 0.55            | 0.02   | 1.08  | sIL-2R         | Treatment | AR/FEP          |
| Sirota 2005 (84)     | 411.60         | 32       | 220.00 | 252.20        | 32       | 184.00 | 0.78            | 0.27   | 1.28  | IL-1RA         | Treatment | AR/FEP          |
| Sirota 2005 (84)     | 1702.00        | 32       | 516.20 | 1689.90       | 32       | 621.00 | 0.02            | -0.47  | 0.51  | sIL-2R         | Treatment | AR/FEP          |
| Song 2009 (86)       | 20.25          | 83       | 12.73  | 25.93         | 83       | 13.30  | -0.43           | -0.74  | -0.13 | IL-1 $\beta$   | Treatment | FEP             |
| Song 2009 (86)       | 29.77          | 83       | 12.64  | 31.01         | 83       | 13.82  | -0.09           | -0.40  | 0.21  | TNF- $\alpha$  | Treatment | FEP             |
| Barak 1995 (25)      | 81.20          | 9        | 96.70  | 266.80        | 10       | 138.40 | -0.8683862      | -1.81  | 0.07  | IL-1 $\beta$   | CSF       | Inpatients      |
| Barak 1995 (25)      | 65.20          | 9        | 1.50   | 69.20         | 10       | 24.60  | -0.1258765      | -1.03  | 0.78  | IL-2           | CSF       | Inpatients      |
| Barak 1995 (25)      | 42.50          | 9        | 18.70  | 51.80         | 10       | 18.20  | -0.2845943      | -1.19  | 0.62  | IL-6           | CSF       | Inpatients      |
| el-Mallakh 1993 (34) | 0.46           | 35       | 0.22   | 0.42          | 16       | 0.20   | 0.19759979      | -0.40  | 0.79  | IL-2           | CSF       | Inpatients      |
| Garver 2003 (6)      | 4.11           | 31       | 2.13   | 3.00          | 14       | 1.24   | 0.57157717      | -0.07  | 1.21  | IL-6           | CSF       | Inpatients      |
| Katila 1994 (45)     | 17.90          | 4        | 1.00   | 25.90         | 5        | 4.60   | -1.2756188      | -2.72  | 0.17  | IL-1 $\beta$   | CSF       | Inpatients      |
| Licinio 1993 (51)    | 987.00         | 10       | 770.00 | 447.00        | 10       | 244.00 | 0.5334244       | -0.36  | 1.43  | IL-2           | CSF       | Inpatients      |
| Licinio 1993 (51)    | 445.00         | 10       | 308.00 | 342.00        | 10       | 193.00 | 0.22610623      | -0.65  | 1.11  | IL-1 $\alpha$  | CSF       | Inpatients      |
| Rapaport 1997 (77)   | 1.03           | 46       | 0.64   | 1.25          | 21       | 0.76   | -0.3184758      | -0.84  | 0.20  | IL-2           | CSF       | Inpatients      |
| Rapaport 1997 (77)   | 0.96           | 32       | 0.64   | 1.31          | 21       | 0.56   | -0.5642427      | -1.13  | 0.00  | IL-1 $\alpha$  | CSF       | Inpatients      |
| vanKammen 1999 (7)   | 0.53           | 61       | 70.00  | 0.25          | 25       | 0.43   | 0.00465332      | -0.46  | 0.47  | IL-6           | CSF       | Inpatients      |
| Vawter 1997 (89)     | 7.10           | 20       | 5.37   | 9.40          | 20       | 5.37   | -0.4181224      | -1.04  | 0.21  | TGF- $\beta$ 1 | CSF       | Inpatients      |
| Vawter 1997 (89)     | 267.10         | 20       | 72.90  | 341.80        | 20       | 113.59 | -0.7636053      | -1.41  | -0.12 | TGF- $\beta$ 2 | CSF       | Inpatients      |

Reference numbers within the table refer to references in the main text.

AR, acutely relapsed inpatients; FEP, first-episode psychosis; SO, stable medicated outpatients; TR, treatment-resistant psychosis.

**Table S4.** Correlations between cytokine (or cytokine receptor or antagonist) levels and clinical features

| Variable         | IL-6 (Blood)                                                |                                                                                                           | IL-6 (CSF)    |                 | IL-12 (Blood) |                                   |
|------------------|-------------------------------------------------------------|-----------------------------------------------------------------------------------------------------------|---------------|-----------------|---------------|-----------------------------------|
|                  | Sig/Direction                                               | Study                                                                                                     | Sig/Direction | Study           | Sig/Direction | Study                             |
| Age              | <b>Yes, Pos</b><br>No, Pos<br>No, Pos<br>No<br>No           | <b>Ganguli 1994 (39)</b><br>Lin 1998 (52)<br>Kim 2000 (46)<br>Frommberger 1997 (37)<br>Kaminska 2001 (44) | No, Neg       | Garver 2003 (6) | No<br>No      | Crespo 2008 (31)<br>Kim 2002 (48) |
| Age Onset        | No<br>No, Pos<br>No<br>No                                   | Akiyama 1999 (23)<br>Kim 2000 (46)<br>Pae 2006 (70)<br>Singh 2009 (83)                                    |               |                 | No<br>No      | Kim 2002 (48)<br>Crespo 2008 (31) |
| Illness Duration | <b>Yes, Pos</b><br><b>Yes, Pos</b><br><b>Yes, Pos</b><br>No | <b>Akiyama 1999 (23)</b><br><b>Ganguli 1994 (39)</b><br><b>Kim 2000 (46)</b><br>Lin 1998 (52)             |               |                 | No            | Kim 2002 (48)                     |
| PANSS Total      | <b>Yes, Pos</b><br>No                                       | <b>Pae 2006 (70)</b><br>Akiyama 1999 (23)                                                                 |               |                 |               |                                   |
| PANSS Pos        | No<br>No                                                    | Akiyama 1999 (23)<br>Kaminska 2001 (44)                                                                   |               |                 |               |                                   |
| PANSS Neg        | No<br>No                                                    | Akiyama 1999 (23)<br>Kaminska 2001 (44)                                                                   |               |                 |               |                                   |
| PANSS Gen        | <b>Yes, Pos</b><br>No                                       | <b>Pae 2006 (70)</b><br>Kaminska 2001 (44)                                                                |               |                 |               |                                   |
| BPRS Total       | <b>Yes, Pos</b><br>No<br>No                                 | <b>Frommberger 1997 (37)</b><br>Lin 1998 (52)<br>Maes 2000 (59)                                           |               |                 | No<br>No      | Kim 2002 (48)<br>Crespo 2008 (31) |
| BPRS Pos         | No                                                          | Maes 2000 (59)                                                                                            |               |                 |               |                                   |
| SAPS             |                                                             |                                                                                                           | No, Neg       | Garver 2003 (6) |               |                                   |
| SANS             | <b>Yes, Pos</b>                                             | <b>Kim 2000 (46)</b>                                                                                      |               |                 |               |                                   |
| PSAS             |                                                             |                                                                                                           |               |                 |               |                                   |

**Table S4.** (continued)

| Variable         | TNF- $\alpha$ (Blood) |                    | IL-1 $\beta$ (Blood) |                | IL-8 (Blood)  |                    |
|------------------|-----------------------|--------------------|----------------------|----------------|---------------|--------------------|
|                  | Sig/Direction         | Study              | Sig/Direction        | Study          | Sig/Direction | Study              |
| Age              | No                    | Kaminska 2001 (44) | No, Neg              | Kim 2000 (46)  | No            | Kaminska 2001 (44) |
| Age Onset        | No                    | Pae 2006 (70)      | No, Pos              | Kim 2000 (46)  |               |                    |
| Illness Duration | No                    | Pae 2006 (70)      | No, Pos              | Kim 2000 (46)  |               |                    |
| PANSS Total      | No                    | Song 2009 (86)     | No                   | Song 2009 (86) |               |                    |
| PANSS Pos        | No                    | Kaminska 2001 (44) |                      |                | No            | Kaminska 2001 (44) |
| PANSS Neg        | No                    | Kaminska 2001 (44) |                      |                | No, Pos       | Kaminska 2001 (44) |
| PANSS Gen        | No                    | Kaminska 2001 (44) |                      |                | No            | Kaminska 2001 (44) |
| BPRS Total       |                       |                    |                      |                |               |                    |
| BPRS Pos         |                       |                    |                      |                |               |                    |
| SAPS             |                       |                    |                      |                |               |                    |
| SANS             |                       |                    |                      |                |               |                    |
| PSAS             |                       |                    |                      |                |               |                    |

**Table S4.** (continued)

| Variable         | IL-1RA (Blood) |                   | IFN- $\gamma$ (Blood) |                           | sIL-2R (Blood) |                   |
|------------------|----------------|-------------------|-----------------------|---------------------------|----------------|-------------------|
|                  | Sig/Direction  | Study             | Sig/Direction         | Study                     | Sig/Direction  | Study             |
| Age              |                |                   | No                    | Kaminska 2001 (44)        |                |                   |
| Age Onset        | No             | Akiyama 1999 (23) |                       |                           | No             | Akiyama 1999 (23) |
|                  | No             | Sirota 2005 (84)  |                       |                           | No             | Sirota 2005 (84)  |
| Illness Duration | No             | Akiyama 1999 (23) |                       |                           | No             | Akiyama 1999 (23) |
|                  | No             | Sirota 2005 (84)  |                       |                           | No             | Sirota 2005 (84)  |
| PANSS Total      | No             | Akiyama 1999 (23) |                       |                           | No             | Akiyama 1999 (23) |
|                  | No             | Sirota 2005 (84)  |                       |                           | No             | Sirota 2005 (84)  |
| PANSS Pos        | No             | Akiyama 1999 (23) | No                    | Kaminska 2001 (44)        | No             | Akiyama 1999 (23) |
|                  | No             | Sirota 2005 (84)  |                       |                           |                |                   |
| PANSS Neg        | No             | Akiyama 1999 (23) | No                    | Kaminska 2001 (44)        | No             | Akiyama 1999 (23) |
|                  |                |                   |                       |                           | No             | Sirota 2005 (84)  |
| PANSS Gen        |                |                   | <b>Yes, Pos</b>       | <b>Kaminska 2001 (44)</b> |                |                   |
| BPRS Total       | No             | Maes 2000 (59)    |                       |                           |                |                   |
| BPRS Pos         | No             | Maes 2000 (59)    |                       |                           |                |                   |
| SAPS             |                |                   |                       |                           |                |                   |
| SANS             |                |                   |                       |                           |                |                   |
| PSAS             |                |                   |                       |                           |                |                   |

**Table S4.** (continued)

| Variable         | IL-2 (Blood)        |                                                                        | IL-2 (CSF)    |                             | IL-10 (Blood) |                           |
|------------------|---------------------|------------------------------------------------------------------------|---------------|-----------------------------|---------------|---------------------------|
|                  | Sig/Direction       | Study                                                                  | Sig/Direction | Study                       | Sig/Direction | Study                     |
| Age              | No                  | <b>Kaminska 2001 (44)</b>                                              | No            | <b>Licinio 1993 (51)</b>    | No            | <b>Kaminska 2001 (44)</b> |
| Age Onset        | No, Pos<br>No<br>No | <b>Kim 2000 (46)</b><br><b>Pae 2006 (70)</b><br><b>Singh 2009 (83)</b> |               |                             | No            | <b>Pae 2006 (70)</b>      |
| Illness Duration | No, Pos<br>No<br>No | <b>Kim 2000</b><br><b>Pae 2006 (70)</b><br><b>Singh 2009 (83)</b>      | No, Pos       | <b>el-Mallakh 1993 (34)</b> | No            | <b>Pae 2006 (70)</b>      |
| PANSS Total      |                     |                                                                        |               |                             |               |                           |
| PANSS Pos        | No                  | <b>Kaminska 2001 (44)</b>                                              |               |                             | No            | <b>Kaminska 2001 (44)</b> |
| PANSS Neg        | No, Pos             | <b>Kaminska 2001 (44)</b>                                              |               |                             | No            | <b>Kaminska 2001 (44)</b> |
| PANSS Gen        | No                  | <b>Kaminska 2001 (44)</b>                                              |               |                             | No            | <b>Kaminska 2001 (44)</b> |
| BPRS Total       | No                  | <b>Gattaz 1992 (41)</b>                                                |               |                             |               |                           |
| BPRS Pos         |                     |                                                                        |               |                             |               |                           |
| SAPS             |                     |                                                                        |               |                             |               |                           |
| SANS             |                     |                                                                        |               |                             |               |                           |
| PSAS             |                     |                                                                        | No, Pos       | <b>el-Mallakh 1993 (34)</b> |               |                           |

Studies that were included are indicated by bold font.

Reference numbers within the table refer to references in the main text.

BPRS, Brief Psychiatric Rating Scale; CSF, cerebrospinal fluid; Gen, general; IFN, interferon; IL, interleukin; Neg, negative; PANSS, Positive and Negative Syndrome Scale; Pos, positive; PSAS, Psychiatric Symptom Assessment Scale; Sig, signal; sIL, soluble interleukin; SANS, Scale for the Assessment of Negative Symptoms; SAPS, Scale for the Assessment of Positive Symptoms; TNF, tumor necrosis factor.

## Supplemental References

1. Hsu PC, Nwulia E, Sawa A (2009): Using bioinformatic tools. *Am J Psychiatry* 166:854.
2. Jia P, Wang L, Meltzer HY, Zhao Z (2010): Common variants conferring risk of schizophrenia: a pathway analysis of GWAS data. *Schizophr Res* 122:38-42.
3. International Schizophrenia Consortium, Purcell SM, Wray NR, Stone JL, Visscher PM, O'Donovan MC, *et al.* (2009): Common polygenic variation contributes to risk of schizophrenia and bipolar disorder. *Nature* 460:748-752.
4. Shi J, Levinson DF, Duan J, Sanders AR, Zheng Y, Pe'er I, *et al.* (2009): Common variants on chromosome 6p22.1 are associated with schizophrenia. *Nature* 460:753-757.
5. Stefansson H (2009): Common variants conferring risk of schizophrenia. *Nature* 460:744-747.
6. Brown AS, Derkits EJ (2010): Prenatal infection and schizophrenia: a review of epidemiologic and translational studies. *Am J Psychiatry* 167:261-280.
7. Romero E, Ali C, Molina-Holgado E, Castellano B, Guaza C, Borrell J (2007): Neurobehavioral and immunological consequences of prenatal immune activation in rats. Influence of antipsychotics. *Neuropsychopharmacology* 32:1791-1804.
8. Romero E, Guaza C, Castellano B, Borrell J (2010): Ontogeny of sensorimotor gating and immune impairment induced by prenatal immune challenge in rats: implications for the etiopathology of schizophrenia. *Mol Psychiatry* 15:372-383.
9. Eaton WW, Byrne M, Ewald H, Mors O, Chen CY, Agerbo E, Mortensen PB (2006): Association of schizophrenia and autoimmune diseases: linkage of Danish national registers. *Am J Psychiatry* 163:521-528.
10. Akanji AO, Ohaeri JU, Al-Shammri S, Fatania HR (2009): Association of blood levels of C-reactive protein with clinical phenotypes in Arab schizophrenic patients. *Psychiatry Res.* 169:56-61.
11. Maes M, Delange J, Ranjan R, Meltzer HY, Desnyder R, Cooremans W, Scharpé S (1997): Acute phase proteins in schizophrenia, mania and major depression: modulation by psychotropic drugs. *Psychiatry Res.* 66:1-11.
12. Maes M, Delanghe J, Bocchio Chiavetto L, Bignotti S, Tura GB, Pioli R, *et al.* (2001): Haptoglobin polymorphism and schizophrenia: genetic variation on chromosome 16. *Psychiatry Res.* 104(1):1-9.
13. Wan C, La Y, Zhu H, Yang Y, Jiang L, Chen Y, *et al.* (2007): Abnormal changes of plasma acute phase proteins in schizophrenia and the relation between schizophrenia and haptoglobin (Hp) gene. *Amino Acids.* 32:101-108.
14. Yang Y, Wan C, Li H, Zhu H, La Y, Xi Z, *et al.* (2006): Altered levels of acute phase proteins in the plasma of patients with schizophrenia. *Anal Chem.* 78:3571-3576.



15. Kowalski J, Blada P, Kucia K, Madej A, Herman ZS (2001): Neuroleptics normalize increased release of interleukin-1 beta and tumor necrosis factor-alpha from monocytes in schizophrenia. *Schizophr Res.* 50:169-175.
16. Wilke I, Arolt V, Rothermundt M, Weitzsch C, Hornberg M, Kirchner H (1996): Investigations of cytokine production in whole blood cultures of paranoid and residual schizophrenic patients. *Eur Arch Psychiatry Clin Neurosci.* 246:279-284.
17. Zorrilla EP, Cannon TD, Gur RE, Kessler J (1996) Leukocytes and organ-nonspecific autoantibodies in schizophrenics and their siblings: markers of vulnerability or disease? *Biol Psychiatry* 40:825-833.
18. Cazzullo CL, Saresella M, Roda K, Calvo MG, Bertrando P, Doria S, *et al.* (1998): Increased levels of CD8+ and CD4+ 45RA+ lymphocytes in schizophrenic patients. *Schizophr Res.* 31:49-55.
19. Schwartz M, Silver H (2000): Lymphocytes, autoantibodies and psychosis--coincidence versus etiological factor: an update. *Isr J Psychiatry Relat Sci.* 37:32-6.
20. Steiner J, Jacobs R, Panteli B, Brauner M, Schiltz K, Bahn S, *et al.* (2010): Acute schizophrenia is accompanied by reduced T cell and increased B cell immunity. *Eur Arch Psychiatry Clin Neurosci.* 260:509-18.
21. Chittiprol S, Venkatasubramanian G, Neelakantachar N, Babu SV, Reddy NA, Shetty KT, Gangadhar BN (2010): Oxidative stress and neopterin abnormalities in schizophrenia: a longitudinal study. *J Psychiatr Res.* 44:310-3.
22. Korte S, Arolt V, Peters M, Weitzsch C, Rothermundt M, Kirchner H (1998): Increased serum neopterin levels in acutely ill and recovered schizophrenic patients. *Schizophr Res.* 32:63-7.
23. Sperner-Unterweger B, Barnas C, Fuchs D, Kemmler G, Wachter H, Hinterhuber H, Fleischhacker WW (1992): Neopterin production in acute schizophrenic patients: an indicator of alterations of cell-mediated immunity. *Psychiatry Res.* 42:121-8.
24. Ng F, Berk M, Dean O, Bush AI (2008): Oxidative stress in psychiatric disorders: evidence base and therapeutic implications. *Int J Neuropsychopharmacol.* 11:851-876.
25. Yao JK, van Kammen DP (2004): Membrane phospholipids and cytokine interaction in schizophrenia. *Int Rev Neurobiol.* 59:297-326.
26. Schroeter ML, Abdul-Khaliq H, Krebs M, Diefenbacher A, Blasig IE (2009): Neuron-specific enolase is unaltered whereas S100B is elevated in serum of patients with schizophrenia--original research and meta-analysis. *Psychiatry Res.* 167:66-72.
27. Foster R, Kandaneeratchi A, Beasley C, Williams B, Khan N, Fagerhol MK, Everall IP (2006): Calprotectin in microglia from frontal cortex is up-regulated in schizophrenia: evidence for an inflammatory process? *Eur J Neurosci.* 24:3561-3566.

28. van Berckel BN, Bossong MG, Boellaard R, Kloet R, Schuitemaker A, Caspers E, *et al.* (2008): Microglia activation in recent-onset schizophrenia: a quantitative (R)-[11C]PK11195 positron emission tomography study. *Biol Psychiatry*. 64:820-822.
29. Kronig H, Riedel M, Schwarz MJ, Strassnig M, Moller HJ, Ackenheil M, Muller N (2005): ICAM G241A polymorphism and soluble ICAM-1 serum levels: evidence for an active immune process in schizophrenia. *Neuroimmunomodulation*. 12:54-59.
30. Schwarz MJ, Riedel M, Gruber R, Müller N, Ackenheil M (1998): Autoantibodies against 60-kDa heat shock protein in schizophrenia. *Eur Arch Psychiatry Clin Neurosci*. 248:282-288.
31. Gaspar PA, Bustamante ML, Silva H, Aboitiz F (2009): Molecular mechanisms underlying glutamatergic dysfunction in schizophrenia: therapeutic implications. *J Neurochem* 111:891-900.
32. Martin LF, Kem WR, Freedman R (2004): Alpha-7 nicotinic receptor agonists: potential new candidates for the treatment of schizophrenia. *Psychopharmacology (Berl)* 174:54-64.
33. Ravikumar A, Deepadevi KV, Arun P, Manojkumar V, Kurup PA (2000): Tryptophan and tyrosine catabolic pattern in neuropsychiatric disorders. *Neurology India* 48:231-238.
34. Nilsson LK, Linderholm KR, Engberg G, Paulson L, Blennow K, Lindström LH, *et al.* (2005): Elevated levels of kynurenic acid in the cerebrospinal fluid of male patients with schizophrenia. *Schizophr Res*. 80:315-322.
35. Sathyaikumar KV, Stachowski EK, Wonodi I, Roberts RC, Rassoulpour A, McMahon RP, Schwarcz R (2010): Impaired kynurenine pathway metabolism in the prefrontal cortex of individuals with schizophrenia. *Schizophr Bull*. 2010 Oct 29. [Epub ahead of print].
36. Barry S, Clarke G, Scully P, Dinan TG (2009): Kynurenine pathway in psychosis: evidence of increased tryptophan degradation. *J Psychopharmacol* 23:287-294.
37. Adib-Conquy M, Cavaillon JM (2009): Compensatory anti-inflammatory response syndrome. *Thromb Haemost*. 101:36-47.
